# Supplementary material
Source: PubMed Central journal article supplement (PMC3383022)

**Table S1. B cell recovery: Characteristics of TLI-ATG patients with no post-transplant rituximab, n=19 versus trial patients, n=35.**

|                               | <b>TLI-ATG pts with no post-transplant R<br/>N=19</b> | <b>TLI-ATG pts with post-transplant R<br/>N= 35</b> |
|-------------------------------|-------------------------------------------------------|-----------------------------------------------------|
| Disease                       | AML: 10<br>2° AML: 2<br>MDS: 5<br>NHL: 1<br>HL: 1     | CLL: 22<br>MCL: 13                                  |
| Recipient age, median (range) | 57 (25-65)                                            | 57 (31-66)                                          |
| Recipient sex                 | 7F, 12M                                               | 12F, 23M                                            |
| Donor sex                     | 15F, 4M                                               | 17F, 18M                                            |
| F donor→M recipient pairs     | 10                                                    | 10                                                  |
| RD/URD                        | 11/8                                                  | 19/16                                               |
| Prior rituximab               | 0                                                     | 35                                                  |

**Table S2. Characteristics of male patients with female donors who were tested for H-Y antibody development.**

|                               | <b>F donor →M recipient pairs in TLI-ATG with no post-transplant R<br/>N=25</b> | <b>F donor→M recipient pairs in TLI-ATG with post-transplant R<br/>N=10</b> |
|-------------------------------|---------------------------------------------------------------------------------|-----------------------------------------------------------------------------|
| Disease                       | AML: 6<br>2° AML: 3<br>MDS: 1<br>NHL: 11<br>HL: 1<br>MF: 1<br>CLL: 2            | CLL: 7<br>MCL: 3                                                            |
| Recipient age, median (range) | 56 (26-66)                                                                      | 56 (31-65)                                                                  |
| F donor→M recipient pairs     | 25                                                                              | 10                                                                          |
| MRD/<br>URD                   | 17/8                                                                            | 5/5                                                                         |
| Prior rituximab               | 12                                                                              | 10                                                                          |
| Prior auto                    | 3                                                                               | 0                                                                           |
| Chronic GVHD                  | 13                                                                              | 0                                                                           |
| H-Y Ab detected               | 14                                                                              | 0                                                                           |
| H-Y Ab+/cGVHD+                | 11*                                                                             | -                                                                           |
| H-Y Ab+/cGVHD-                | 3                                                                               |                                                                             |
| H-Y Ab-/cGVHD+                | 2                                                                               |                                                                             |
| H-Y Ab-/cGVHD-                | 9                                                                               |                                                                             |
| Alive/Dead                    | 25/0                                                                            | 7/3                                                                         |

\*H-Y Ab detection associates with chronic GVHD (P<0.005; Fisher's exact test).

AML= acute myeloid leukemia, 2° AML=secondary AML, MDS= myelodysplastic syndrome, NHL= non-Hodgkin's lymphoma, HL= Hodgkin lymphoma, MF= myelofibrosis, CLL= chronic lymphocytic leukemia, MRD= matched related donor, URD= unrelated donor, auto= autologous transplant

## **Supplementary Figure Legends**

**Figure S1. Rituximab detected preHCT predicts low donor B cell recovery at day 56.** Blood collected immediately before conditioning was measured by ELISA for rituximab concentration ( $\mu\text{g/ml}$ ; X-axis). Each preHCT rituximab level was related to the respective absolute donor  $\text{CD19}^+\text{CD5}^-$  B cell measured 56 days after HCT (Y-axis). The patients with detectable rituximab pretransplant had fewer day 56 donor B cells than those who had no detectable rituximab at the time of transplant (Figure 2b). CLL patients receiving alemtuzumab treatment before transplant ( $\square$ ) also had impaired day 56 donor B cell engraftment.

**Figure S2. Rituximab-related neutropenia.**

Every WBC measured for all 35 patients is graphically related to the number of days following transplant. Overall, 14 patients tested neutropenic ( $\blacksquare$ ; neutrophils  $<500/\mu\text{l}$  blood) one or more times after the day 56 rituximab infusion; ten of these 14 were neutropenic before day 56 rituximab as well. Eleven patients never developed neutropenia before or after day 56 rituximab infusion. Day 56, 63, 70, and 77 rituximab infusion times are represented by red vertical lines.

**Figure S3. CMV reactivation and CMV disease.** CMV reactivation ( $\bullet$ ) occurred before rituximab infusion in the majority of patients. Only two patients (SPN 3926, 3855) reactivated CMV after rituximab. One patient (SPN 3975) developed CMV disease ( $\blacktriangle$ ).

Figure S1.

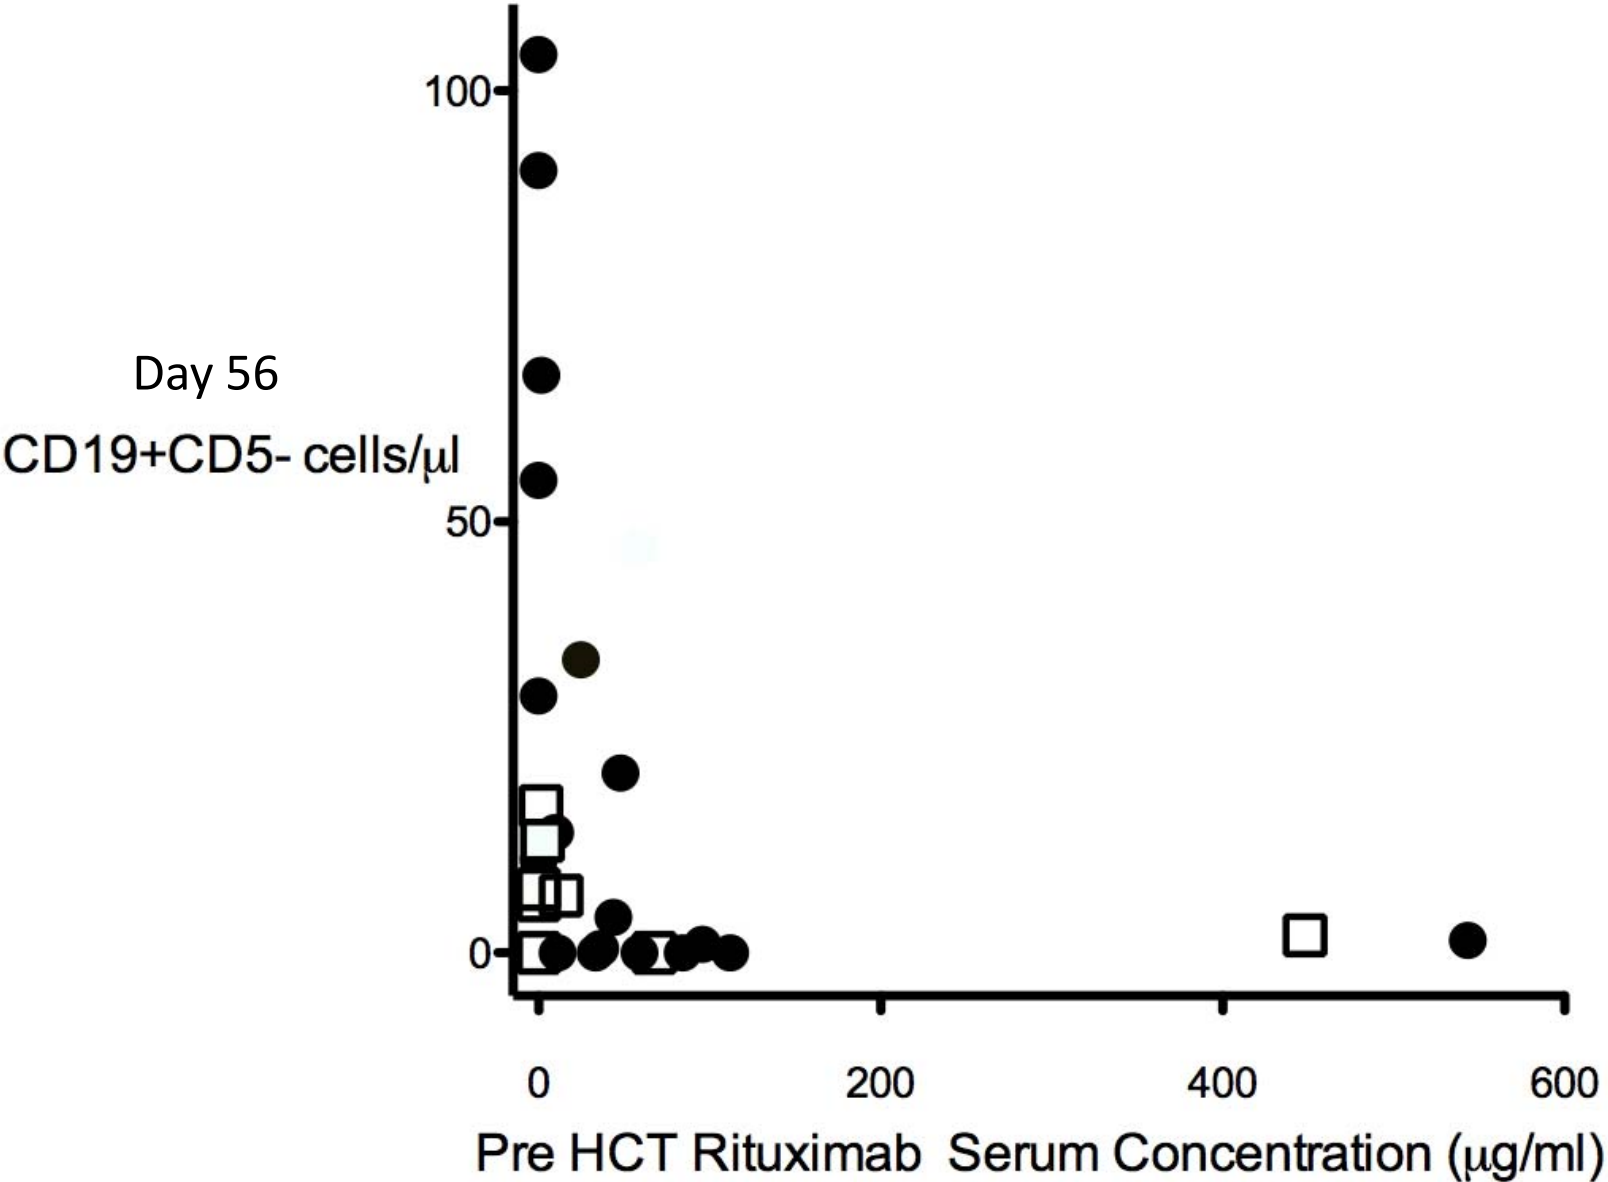

Figure S2.

### Observed Absolute Neutrophil Count

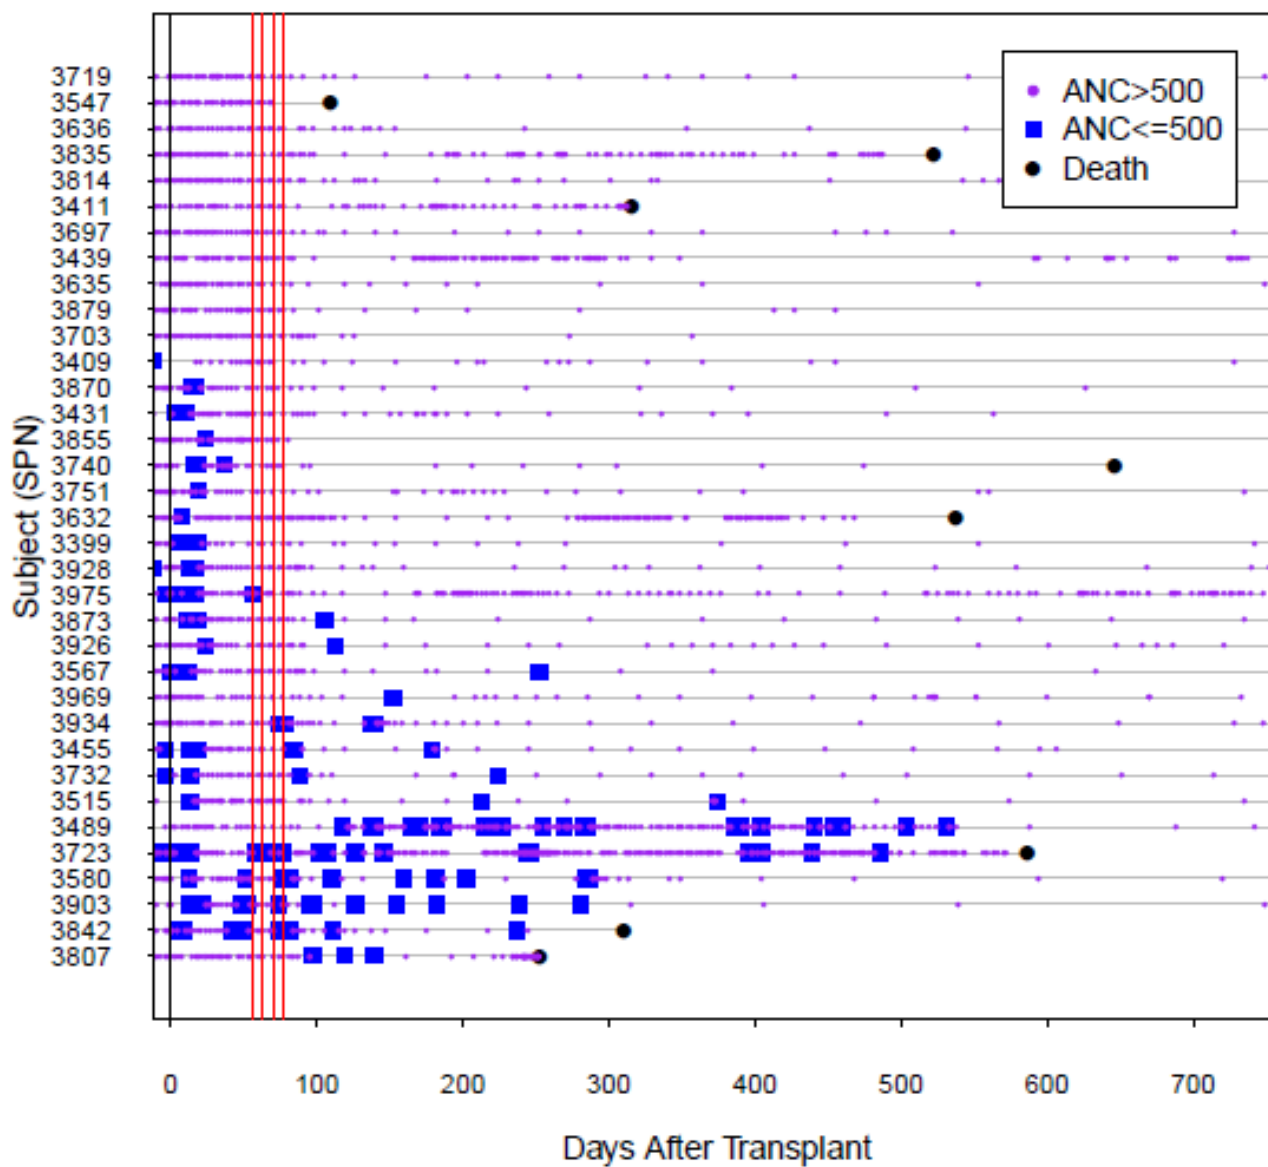

Figure S3.

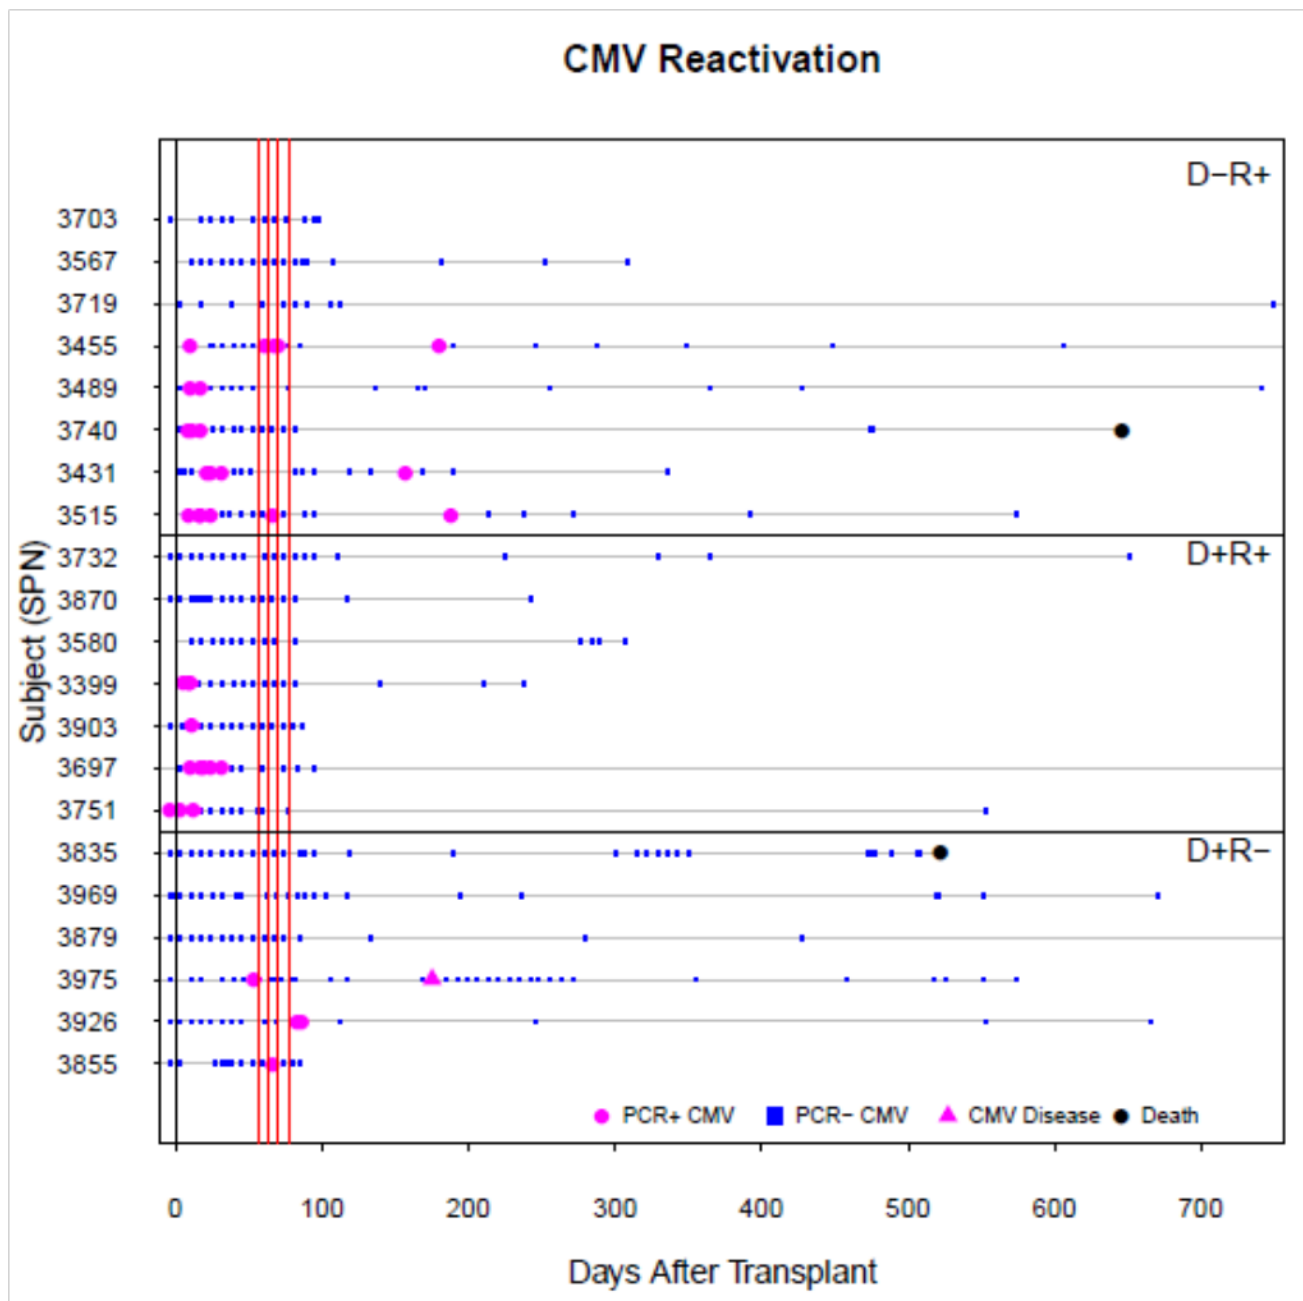

Supplement: supp_blood-2011-12-395970_blood-2011-12-395970-1.pdf [file supp_blood-2011-12-395970_blood-2011-12-395970-1.pdf]
